# Supplementary material for: Comparative Analysis of Fluorinated Anions for Polypyrrole Linear Actuator Electrolytes
Source: MDPI journal article supplement (doi:10.3390/polym11050849), 2019-05-10
Supplement: s1 [file s1]

## **Supplementary**

### **Comparative analysis of fluorinated anions for polypyrrole linear actuator electrolytes**

Nguyen Quang Khuyen<sup>1</sup>, ZaneZondaka<sup>2</sup>, Madis Harjo<sup>2</sup>, Janno Torop<sup>2</sup>, Tarmo Tamm<sup>2</sup> and  
Rudolf Kiefer<sup>1,\*</sup>

<sup>1</sup>Conducting polymers in composites and applications Research Group, Faculty of Applied Sciences, Ton Duc Thang University, Ho Chi Minh City, Vietnam

<sup>2</sup>Intelligent Materials and Systems Lab, Faculty of Science and Technology, University of Tartu, Nooruse 1, 50411 Tartu, Estonia

\*Corresponding author. Tel: +886 905605515. E-mail: [rudolf.kiefer@tdtu.edu.vn](mailto:rudolf.kiefer@tdtu.edu.vn) (Rudolf Kiefer)

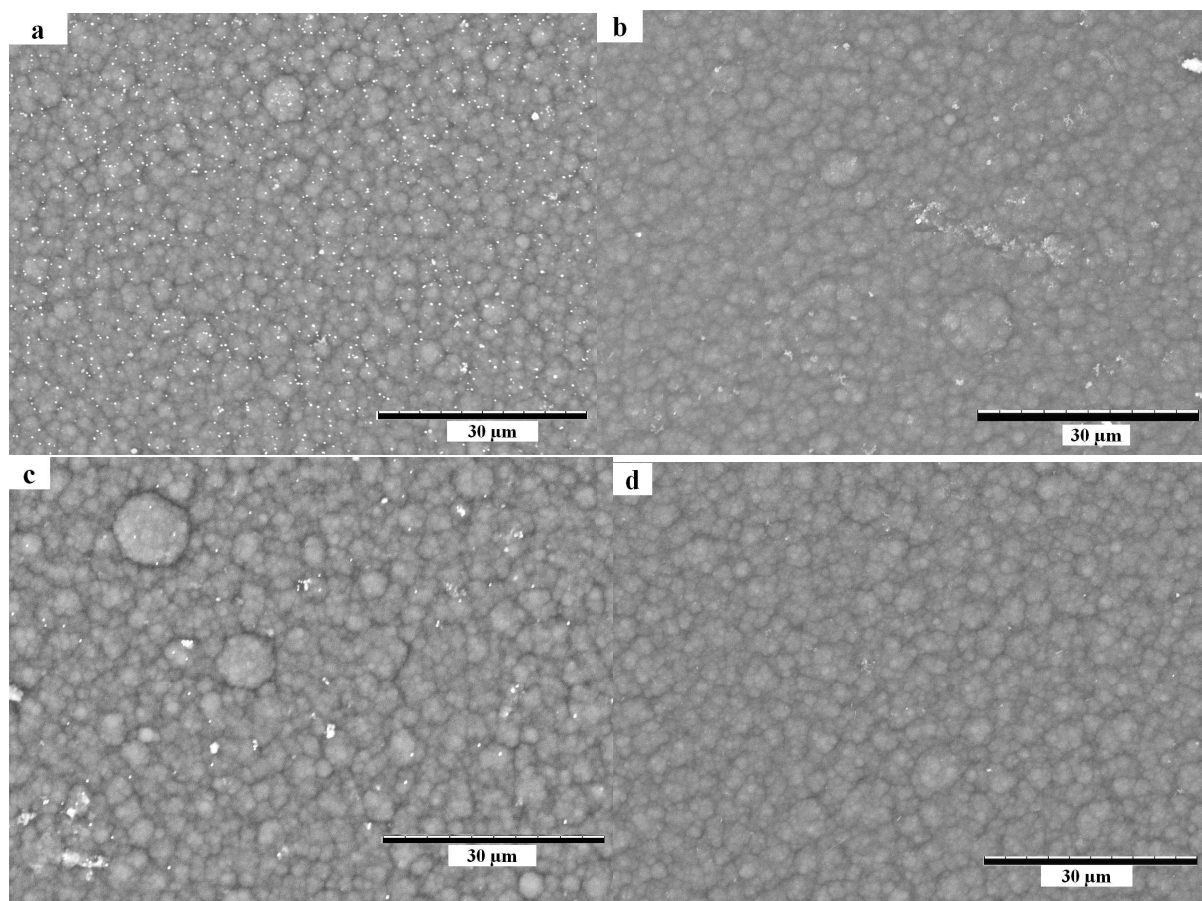

Figure S1: The SEM surface images at oxidation state (+1.0 V) (scale bar 30  $\mu\text{m}$ ) are shown for PPy/DBS films actuated in in a: LiTFSI, b: LiCF<sub>3</sub>SO<sub>3</sub>, c: TBACF<sub>3</sub>SO<sub>3</sub> and d: TBAPF<sub>6</sub>.
